# Supplementary material
Source: PubMed Central journal article supplement (PMC3145703)
Supplement: 1019041108_pnas.201019041SI.pdf [file 1019041108_pnas.201019041SI.pdf]

# Supporting Information

Sauer et al. 10.1073/pnas.1019041108

## SI Materials and Methods

**Cell Death Infections.** *Listeria monocytogenes* 10403s and the isogenic  $\Delta hly$  mutant were grown overnight in brain heart infusion (BHI) at 30 °C stationary. *Legionella pneumophila* Lp02 were grown in Aces-buffered Yeast Extract Broth (AYE) before infection (1). *L. pneumophila* cultures were subcultured in AYE at 37 °C shaking overnight until bacteria reached stationary phase (OD<sub>600</sub> ~4.0) before infection.

**Strain Construction.** For construction of the L.p.FlaA construct, the *flaA* coding sequence was PCR amplified from *L. pneumophila* LP02 genomic DNA with the primers (AAAAGGA-TCCGCTCAAGTAATCAACACTAATGTG) and (AAAAG-CGGCCGCAGAAATCGAAGTGCAGTTGTT) (underlines signify restriction digest sites built into the primers). The 1-490 bp PCR product was digested with BamHI and EagI and cloned downstream of the *actA* promoter and in-frame with the amino terminal 300 bp of the *actA* gene in the site-specific integration vector pPL2. The construct was integrated at the *tRNA<sup>Arg</sup>* locus of the *L. monocytogenes* chromosome in 10403s background, as previously described (2).

The  $\Delta actA/\Delta inlB$  background was previously described (3). For construction of the ovalbumin (OVA)-B8R construct, the immunodominant H-2K<sup>b</sup> restricted vaccinia B8R<sub>20-27</sub> epitope (TSYKFESV) was inserted at the junction of an ActA-OVA

fusion construct by oligonucleotide directed PCR as previously described (4). This construct was subcloned using KpnI and SacI into an erythromycin resistant version of pPL2 and integrated on the chromosome at the *tRNA<sup>Arg</sup>* locus of the  $\Delta actA/\Delta inlB$  strain as previously described (2). For strains expressing both OVA/B8R and L.p.FlaA, the L.p.FlaA construct described above was subcloned into pPL1 using KpnI and EagI and integrated into the chromosome at the *comK* locus as previously described (2).

**Tetramer Staining.** Tetramer staining was performed using K<sup>b</sup>-SIINFEKL-phycoerythrin tetramer, a kind gift from Mark Davis (Stanford University, Stanford, CA). Tetramer was added along with surface antibodies and incubated for 1 h at room temperature.

**Dendritic Cell Quantification.** Mice were infected intravenously with 0.1 LD50 ( $1 \times 10^7$ ) of either  $\Delta actA/inlB$ ,  $\Delta actA/inlB$  *L. monocytogenes* - L.p.FlaA or PBS as a control. Six, 24, or 48 h post-infection spleens were harvested and dissociated and red blood cells removed using red blood cell lysing buffer (Sigma). Next,  $1.4 \times 10^6$  splenocytes were stained and dendritic cells were characterized as CD11b<sup>+</sup> (Clone M1/70; eBiosciences) and CD11c<sup>+</sup> (Clone N418; eBiosciences). Dead dendritic cells were scored based on 7AAD-positivity (eBiosciences).

1. Molofsky AB, et al. (2006) Cytosolic recognition of flagellin by mouse macrophages restricts Legionella pneumophila infection. *J Exp Med* 203(4):1093–1104.
2. Lauer P, Chow MY, Loessner MJ, Portnoy DA, Calendar R (2002) Construction, characterization, and use of two *Listeria monocytogenes* site-specific phage integration vectors. *J Bacteriol* 184(15):4177–4186.
3. Brockstedt DG, et al. (2004) *Listeria*-based cancer vaccines that segregate immunogenicity from toxicity. *Proc Natl Acad Sci USA* 101:13832–13837.
4. Sinnathamby G, et al. (2009) Priming and activation of human ovarian and breast cancer-specific CD8<sup>+</sup> T cells by polyvalent *Listeria monocytogenes*-based vaccines. *Immunother* 32(8):856–869.

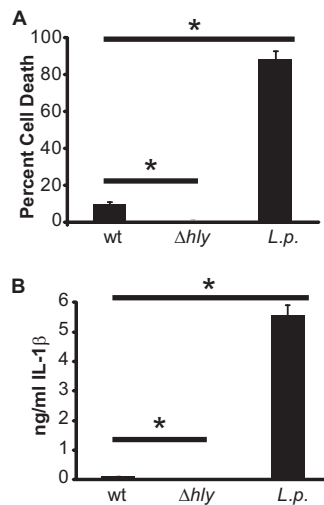

**Fig. S1.** Inflammasome activation by *L. monocytogenes* and *L. pneumophila*. Cell death (A) and IL-1 $\beta$  (B) secretion were measured 6 h after infection of bone marrow-derived macrophages with a multiplicity of infection (MOI) of five bacteria per cell. Data are representative of at least three independent experiments. \* $P < 0.05$  by Student's *t*-test.

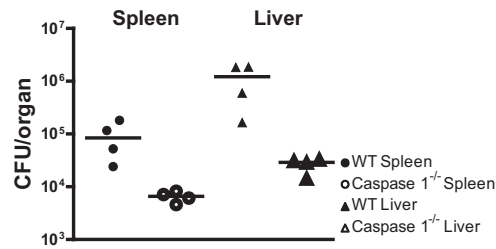

**Fig. S2.** Caspase-1 is not required for control of *L. monocytogenes* infection. Wild-type (closed symbols) or Caspase-1<sup>-/-</sup> (open symbols) mice were infected with 1 × 10<sup>4</sup> wild-type *L. monocytogenes* and CFU per organ were determined 5 d postinfection. Data are representative of at least two independent experiments.

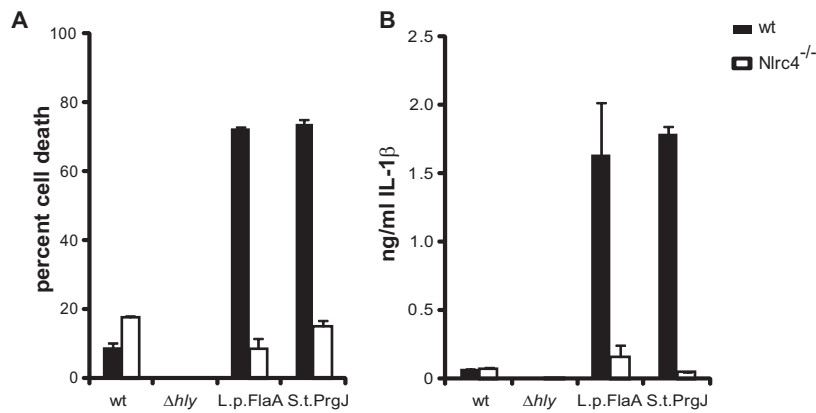

**Fig. S3.** Induction of host cell death and IL-1β by *L. monocytogenes* strains that ectopically secrete type III secretion rod protein PrgJ. Cell death (A) and IL-1β (B) secretion were measured following 6 h of infection at an MOI of 5 in wild-type or Nlrc4<sup>-/-</sup> bone marrow-derived macrophages. Data are representative of at least three independent experiments.

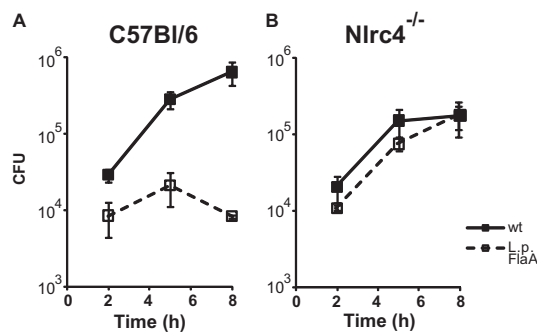

**Fig. S4.** Intracellular growth of wild-type and L.p.FlaA *L. monocytogenes*. Wild-type (solid line) or *L. monocytogenes*-L.p.FlaA (dashed line) were grown in wild-type (A) or Nlrc4<sup>-/-</sup> (B) bone marrow-derived macrophages and CFU enumerated at indicated times. Growth curves are representative of at least three independent experiments.

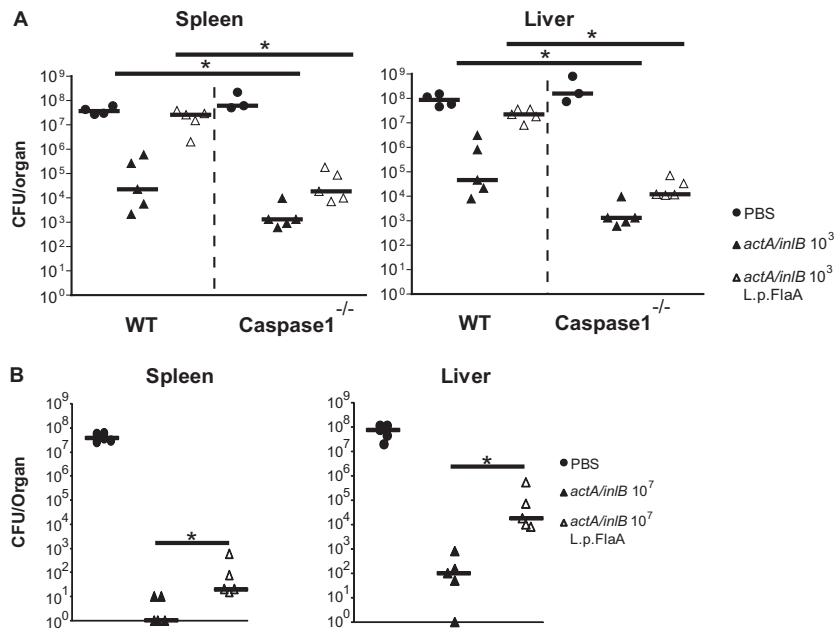

**Fig. 55.** Protective immunity in Caspase-1<sup>-/-</sup> mice 30 d postimmunization and in wild-type mice 90 d postimmunization. (A) Wild-type or Caspase-1<sup>-/-</sup> mice were immunized with  $10^3$   $\Delta actA/inlB$  (closed symbols) or  $\Delta actA/inlB$  *L. monocytogenes*-L.p.FlaA (open symbols). Thirty days postimmunization, mice were rechallenged with  $2 \times 10^5$  wild-type bacteria and CFU per organ were analyzed 68 to 72 h postchallenge. (B) Wild-type mice were immunized with  $1 \times 10^7$   $\Delta actA/inlB$  (closed symbols) or  $\Delta actA/inlB$  *L. monocytogenes*-L.p.FlaA (open symbols) bacteria. Ninety days postimmunization, mice were challenged with  $2 \times 10^5$  wild-type bacteria and CFU per organ were analyzed 68 to 72 h postchallenge. Data are representative of at least two independent experiments. \* $P < 0.05$  by Mann-Whitney test.

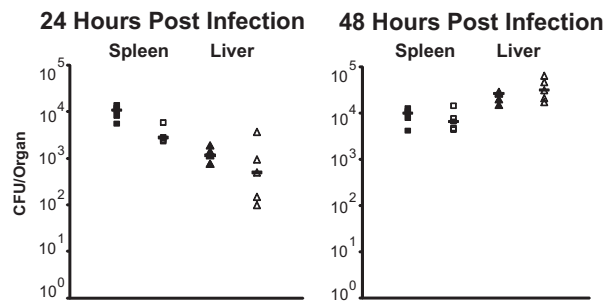

**Fig. 56.** Clearance of  $\Delta actA/inlB$  versus  $\Delta actA/inlB$  *L. monocytogenes*-L.p.FlaA following immunization. Wild-type mice were infected with  $1 \times 10^3$   $\Delta actA/inlB$  (closed symbols) or  $\Delta actA/inlB$  *L. monocytogenes*-L.p.FlaA (open symbols) and CFU was determined 24 or 48 h postinfection in the spleen (squares) and liver (triangles). Data are representative of at least two independent experiments.

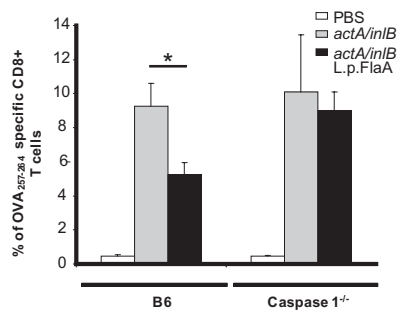

**Fig. 57.** Tetramer-positive antigen-specific CD8<sup>+</sup> T cells. Proportion of OVA<sub>257-264</sub>-specific T cells within a CD8<sup>+</sup> cell gate, 7 d postinjection of  $1 \times 10^7$  CFU of  $\Delta actA/inlB$ ,  $\Delta actA/inlB$  *L. monocytogenes*-L.p.FlaA expressing OVA and B8R or PBS to C57BL/6 and caspase-1<sup>-/-</sup> mice, determined using K<sup>b</sup>-OVA<sub>257-264</sub> tetramers. One representative experiment out of two is shown. \* $P < 0.05$  by Mann-Whitney test.

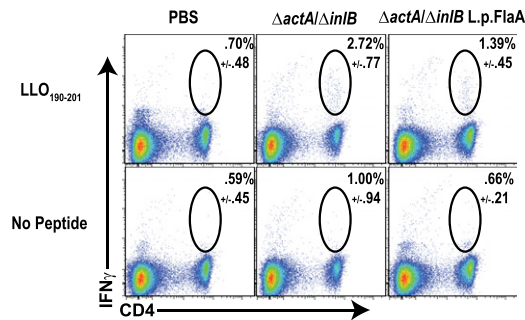

**Fig. S8.** Induction of LLO<sub>190-201</sub>-specific CD4<sup>+</sup> T cells. C57BL/6 mice were injected with  $1 \times 10^7$  CFU of  $\Delta actA/\Delta inlB$ ,  $\Delta actA/\Delta inlB$  *L. monocytogenes*-L.p.FlaA expressing OVA and B8R epitopes or PBS. Seven days postimmunization, the percentage of antigen-specific IFN- $\gamma$ <sup>+</sup> CD4<sup>+</sup> T cells was determined using intracellular cytokine staining after in vitro restimulation with the LLO<sub>190-201</sub>. Values in each plot represent the mean  $\pm$  SD of antigen-specific cells within a CD4<sup>+</sup> cell gate among splenocytes from four to five animals per group. One representative experiment of two to four is shown.

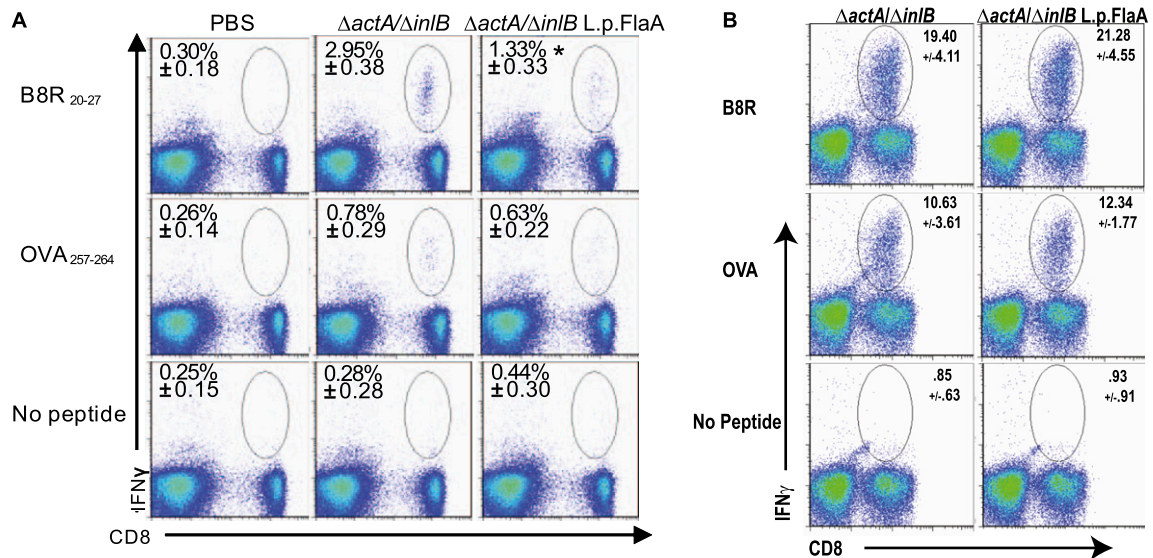

**Fig. S9.** CD8<sup>+</sup> memory responses following immunization (A) C57BL/6 mice were injected with  $1 \times 10^7$  CFU of  $\Delta actA/\Delta inlB$  or  $\Delta actA/\Delta inlB$  *L. monocytogenes*-L.p.FlaA-expressing OVA and B8R epitope. Thirty-five days postimmunization, the percentage of antigen-specific IFN- $\gamma$ <sup>+</sup> CD8<sup>+</sup> T cells was determined using intracellular cytokine staining after in vitro restimulation with the indicated peptide. Values in each plot represent the mean  $\pm$  SD of antigen-specific cells within a CD8<sup>+</sup> cell gate among splenocytes from four to five animals per group. (B) C57BL/6 mice immunized with  $\Delta actA/\Delta inlB$  or  $\Delta actA/\Delta inlB$  *L. monocytogenes*-L.p.FlaA ( $10^7$  CFU) expressing OVA and B8R were challenged with  $2 \times 10^5$  *L. monocytogenes*-expressing OVA and B8R at 30 d postinfection. Splenocytes were harvested 5 d later and the percentage of antigen-specific IFN- $\gamma$ <sup>+</sup> CD8<sup>+</sup> T cells was determined using intracellular cytokine staining after in vitro restimulation with the indicated peptide. Values in each plot represent the mean  $\pm$  SD of antigen-specific cells within a CD8<sup>+</sup> cell gate among splenocytes from five animals per group. One representative experiment of two to four is shown.

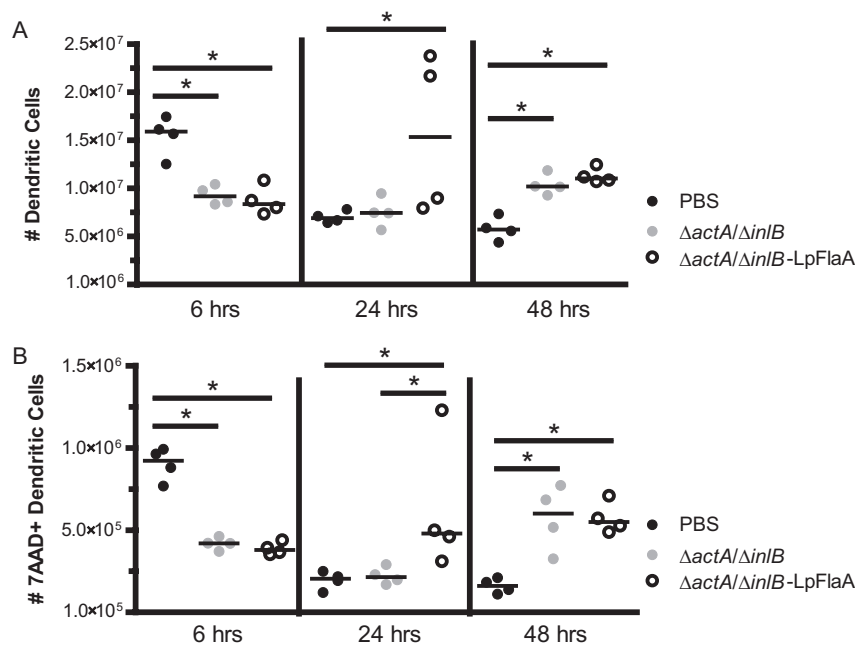

**Fig. S10.** Dendritic cell survival postimmunization. (A) Total and (B) dead dendritic cells were quantified 6, 24, and 48 h post immunization with 0.1 LD50 of  $\Delta actA/\Delta inIB$  or  $\Delta actA/\Delta inIB$  *L. monocytogenes*-L.p.FlAa. \* $P < 0.05$  by Mann-Whitney test.
